# Supplementary material
Source: PubMed Central journal article supplement (PMC1626149)

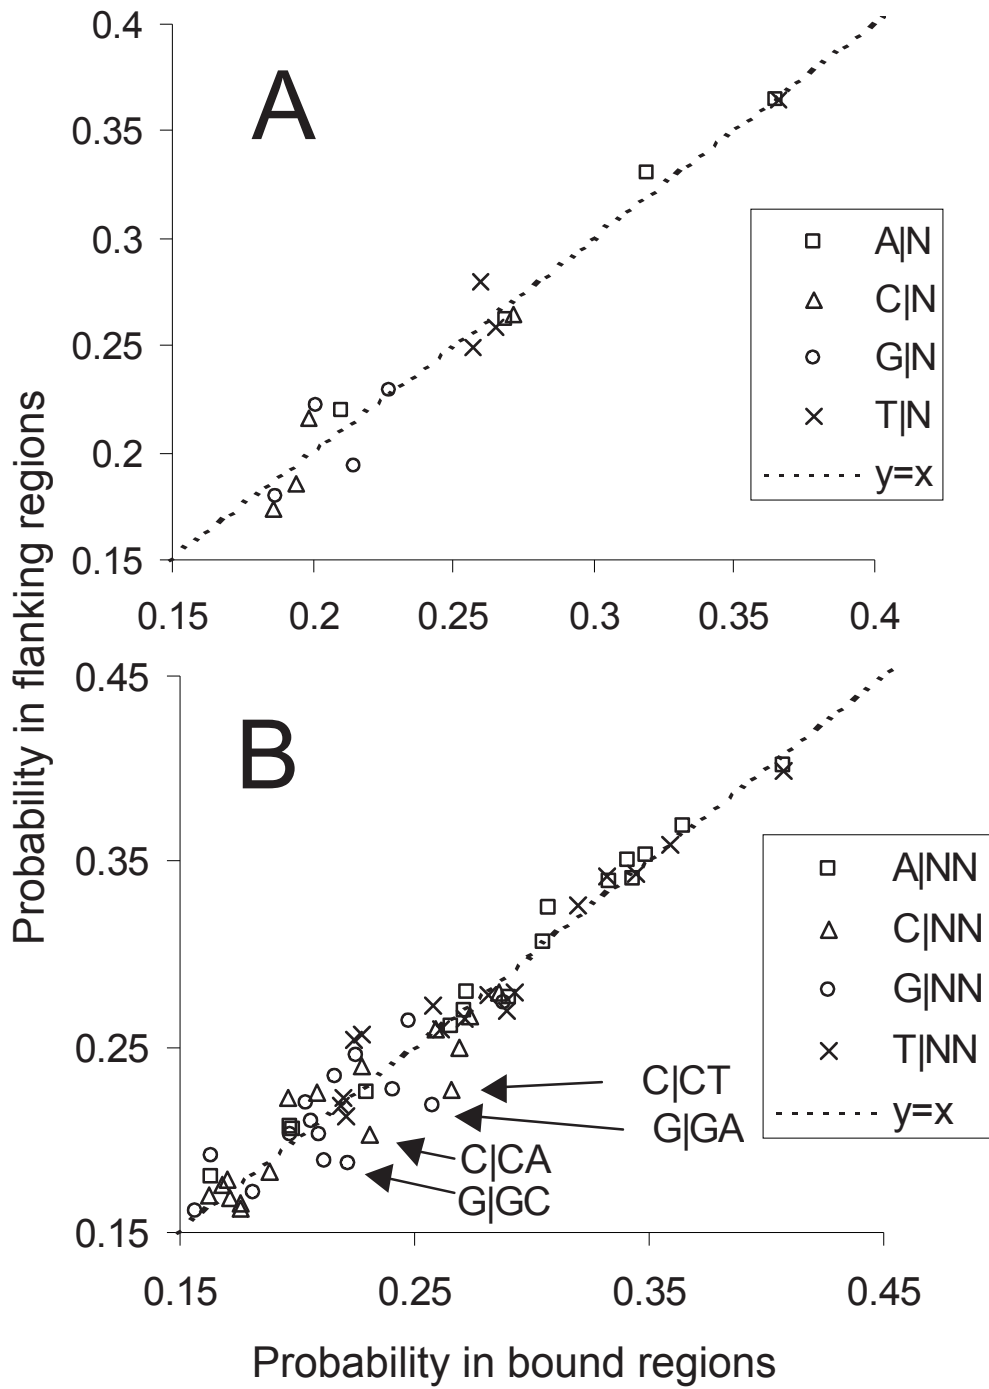

Supplement: pcbi.0020130.sg001.pdf [file pcbi.0020130.sg001.pdf]
